# Supplementary material
Source: PubMed Central journal article supplement (PMC3365212)
Supplement: 1119131109_pnas.201119131SI.pdf [file 1119131109_pnas.201119131SI.pdf]

# Supporting Information

Bauerle et al. 10.1073/pnas.1119131109

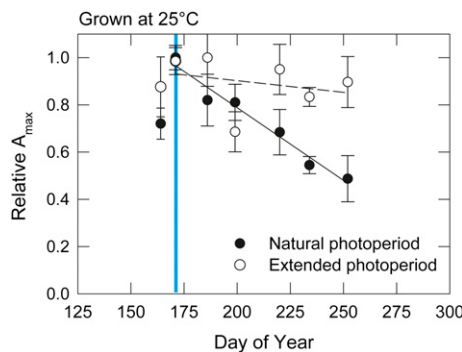

**Fig. S1.** Seasonal changes in light-saturated net photosynthesis ( $A_{\max}$ ) normalized by maximum measured values for each individual and set at 1.0 for the maximum value of the date means in saplings exposed to either naturally changing photoperiod (black circles, solid line) or a constant extended photoperiod of 16 h (empty circles, dashed line) (means  $\pm$  SE,  $n = 2-4$ ). Growth temperature was controlled at 25 °C during the study. Cyan bar indicates summer solstice. Data were collected with a portable steady-state gas exchange system (CIRAS-II, PP Systems) on the same leaves as maximum Rubisco carboxylation rate ( $V_{\max}$ ) measurements; cuvette conditions were 25 °C air temperature, 1.3 kPa vapor pressure deficit, saturating light ( $1,200 \mu\text{mol}\cdot\text{m}^{-2}\cdot\text{s}^{-1}$ ) and ambient  $\text{CO}_2$ . Results postsolstice were analyzed with a general linear model with time, replicate and treatment, nesting replicate within treatment: regression for natural photoperiod,  $r^2 = 0.50$ ,  $P = 0.0001$ ; extended photoperiod,  $r^2 = 0.04$ ,  $P = 0.38$ .

**Table S1. Model estimates of annual cycle of atmospheric  $\text{CO}_2$ , with and without photoperiod controls on  $V_{\max}$ , evaluated against means (SDs) of Globalview observations**

| Latitude | No. of stations | GV seasonal amplitude (ppm) | Model without photoperiod correction |                            |                           | Model with photoperiod correction |                            |                           |
|----------|-----------------|-----------------------------|--------------------------------------|----------------------------|---------------------------|-----------------------------------|----------------------------|---------------------------|
|          |                 |                             | Correlation with GV ( $r$ )          | Amplitude ratio (model/GV) | Mean absolute error (ppm) | Correlation with GV ( $r$ )       | Amplitude ratio (model/GV) | Mean absolute error (ppm) |
| All      | 60              | 9.3 (6.1)                   | 0.91                                 | 0.74 (0.18)                | 2.8 (2.3)                 | 0.92                              | 0.87 (0.21)                | 1.9 (1.5)                 |
| 60–90°N  | 7               | 14.6 (0.5)                  | 0.90                                 | 0.64 (0.05)                | 5.2 (0.6)                 | 0.91                              | 0.80 (0.05)                | 2.9 (0.7)                 |
| 30–60°N  | 28              | 12.9 (4.9)                  | 0.91                                 | 0.73 (0.20)                | 3.7 (2.3)                 | 0.92                              | 0.88 (0.20)                | 2.6 (1.6)                 |
| 0–30°N   | 11              | 7.0 (1.5)                   | 0.95                                 | 0.69 (0.05)                | 2.2 (0.6)                 | 0.95                              | 0.81 (0.05)                | 1.3 (0.5)                 |
| 0–90°S   | 14              | 1.3 (0.5)                   | 0.63                                 | 0.82 (0.34)                | 0.4 (0.4)                 | 0.68                              | 0.92 (0.34)                | 0.3 (0.4)                 |

Based on detrended and demeaned seasonal cycles for the period 1988–2004. GV, Globalview.
